# Supplementary material
Source: publisher site journal article supplement (https://www.degruyterbrill.com/publication/journal_key/KANT/downloadAsset/KANT_Peer%20Review%20Policy%20Kant%20Studien.pdf)
Supplement: Supplementary file [file KANT_Peer%20Review%20Policy%20Kant%20Studien.pdf]

## Peer Review Policy

*Kant Studien* follows a double-blind peer review process:

Articles are submitted either by potential contributors directly or at the invitation of the journal editors. With the exception of commissioned book reviews and miscellaneous items that are directly reviewed by the editors, all research articles undergo a double-blind peer-review process.

1. If the editors agree that a submitted research article potentially merits publication, the article enters the peer-review process.
2. Research articles undergo a double-blind peer review, i.e., neither author(s) nor reviewers are aware of each other's identities.
3. Research articles are usually reviewed by two external referees. A third external referee may be included if the reports submitted by the first two referees do not allow for a decision about the publication of a research article.
4. The peer review normally takes approximately three to four months.
5. Based on the reviewers' reports, the editors decide and communicate to the author(s) whether, and on which grounds, the submitted article is "accepted," requires "minor" or "major revisions," or has to be "rejected." In case revisions are necessary, all the referees' suggestions and queries must be taken into consideration and authors must document their responses and changes.
6. The editors make a final decision about the publication of every research article once all revisions have been made. The editors reserve the right to initiate an additional peer-review process if they deem necessary.
